# Supplementary material for: Supramolecular Functionalisation of B/N Co-Doped Carbon Nano-Onions for Novel Nanocarrier Systems
Source: MDPI journal article supplement (doi:10.3390/ma15175987), 2022-08-30
Supplement: s1 [file s1]

Article

# Supramolecular functionalisation of B/N co-doped carbon nano-onions for novel nanocarrier systems

Hugh Mohan <sup>1</sup>, Valeria Bincoletto <sup>2</sup>, Silvia Arpicco <sup>2</sup> and Silvia Giordani <sup>2,\*</sup>

<sup>1</sup> School of Chemical Sciences, Dublin City University, Glasnevin, Dublin 9, Ireland

<sup>2</sup> Department of Drug Science and Technology, University of Torino, Via P. Giuria 9, Torino, Italy

\* Correspondence: [silvia.giordani@dcu.ie](mailto:silvia.giordani@dcu.ie)

## Supplementary Material

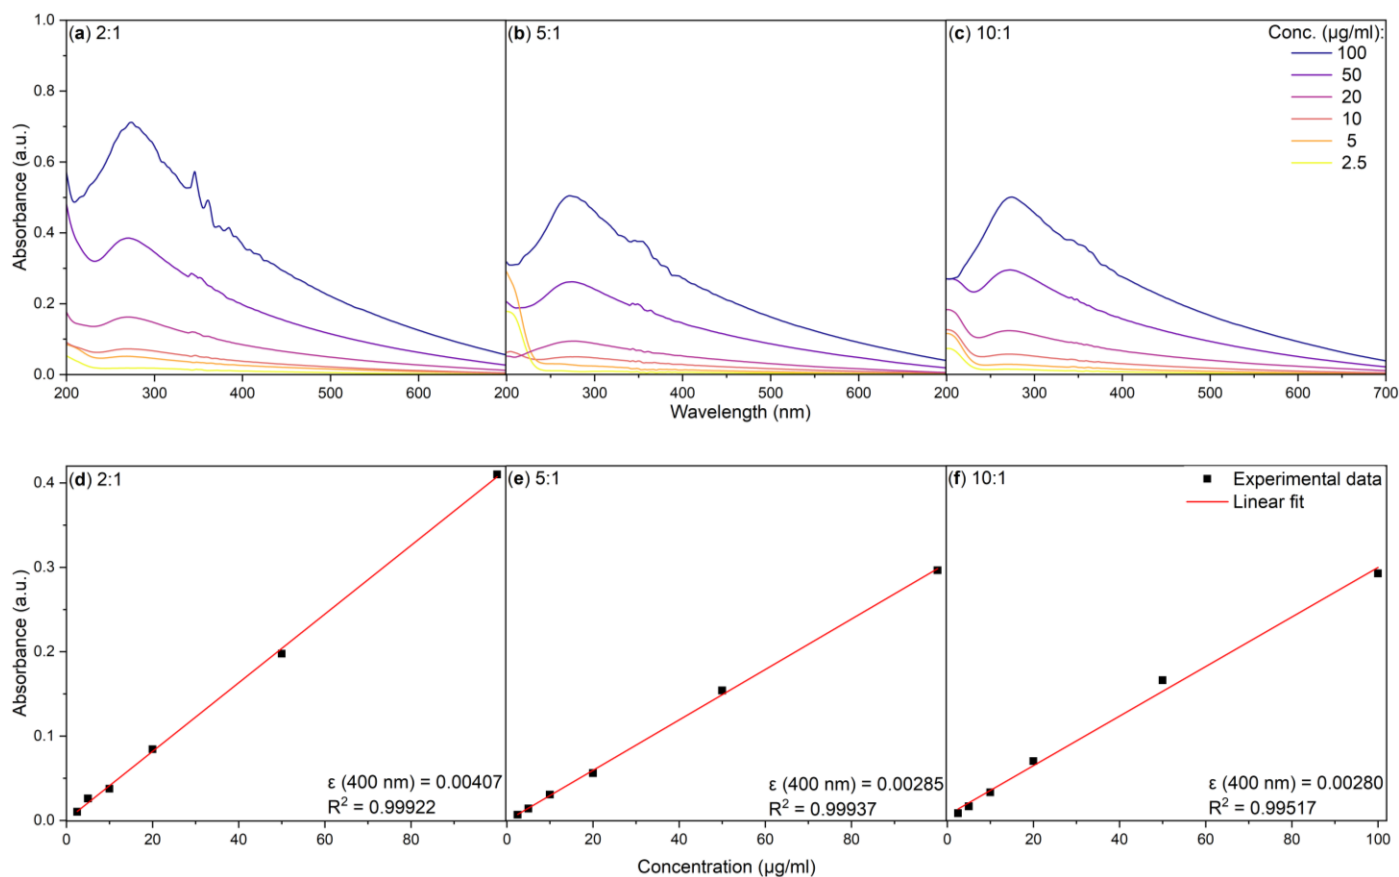

**Figure S1.** UV-Vis absorption spectra of (a) 2:1 BN-CNO/HA-DMPE, (b) 5:1 BN-CNO/HA-DMPE and, (c) 10:1 BN-CNO/HA-DMPE at different concentrations in deionised water; (d) – (f) corresponding absorbance vs concentration plots with molar extinction coefficients calculated at 400 nm.

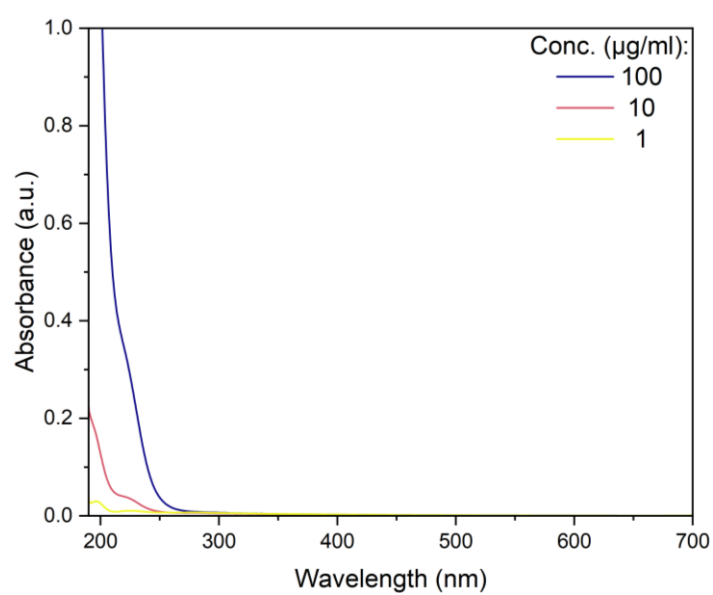

**Figure S2.** UV-Vis absorption spectrum of HA-DMPE in deionised water at various concentrations.
